# Supplementary material for: Development of miniaturized fluorimetric device for caffeine determination using a smartphone
Source: Royal Society of Chemistry journal article supplement (doi:10.1039/c9ra06220c), 2019-01-01
Supplement: c9ra06220c1.pdf [file c9ra06220c1.pdf]

Table 1 - Smartphone adjustment for image acquisition

| <b>Parameters</b>  | <b>Definition</b> |
|--------------------|-------------------|
| Flash              | Continuous        |
| Focus              | Continuous        |
| ISO                | 1600              |
| Auto stabilization | Disabled          |
| White balance      | Daylight          |
| Face detection     | Disabled          |
| Timer              | Disabled          |
| Scene mode         | Hdr               |
| Color effect       | None              |
| Range              | None              |
| Exposure caught    | Enabled           |
